# Supplementary material
Source: MDPI journal article supplement (https://www.mdpi.com/1424-2818/14/7/559)
Supplement: s1 [file s1]

# Transcriptome dynamics of an oyster larval response to a conspecific cue-mediated settlement induction in Pacific oyster *Crassostrea gigas*

Mary Grace Sedanza<sup>1,2,\*</sup>, Jalal Alshaweesh<sup>3,4</sup>, Yi-Li Gao<sup>5</sup>, Asami Yoshida<sup>1</sup>, Hee-Jin Kim<sup>1</sup>, Kenichi Yamaguchi<sup>1</sup>, Cyril Glenn Satuito<sup>1,6</sup>

<sup>1</sup> Graduate School of Fisheries and Environmental Sciences, Nagasaki University, Nagasaki 852-8521, Japan; y-asami@nagasaki-u.ac.jp (A.Y.); heejin@nagasaki-u.ac.jp (H.-J.K.); kenichi@nagasaki-u.ac.jp (K.Y.); satuito@nagasaki-u.ac.jp (C.G.S.)

<sup>2</sup> Institute of Aquaculture, College of Fisheries and Ocean Sciences, University of the Philippines Visayas, Miagao Iloilo 5023, Philippines

<sup>3</sup> Department of Parasitology, Institute of Tropical Medicine (NEKKEN), Nagasaki University, Nagasaki 852-8523, Japan; bb55418852@ms.nagasaki-u.ac.jp

<sup>4</sup> Graduate School of Biomedical Science, Doctoral Leadership Program, Nagasaki University, Nagasaki 852-8523, Japan

<sup>5</sup> College of Science and Technology, Ningbo University, Ningbo 315300, China; loootutugaoyili@163.com (Y.-L.G.)

<sup>6</sup> Organization for Marine Science and Technology, Nagasaki University, Nagasaki 852-8521, Japan

\* Correspondence: bb53419802@ms.nagasaki-u.ac.jp or mcsedanza@up.edu.ph; Tel.: +81-95-819-2853

## Supplementary Materials

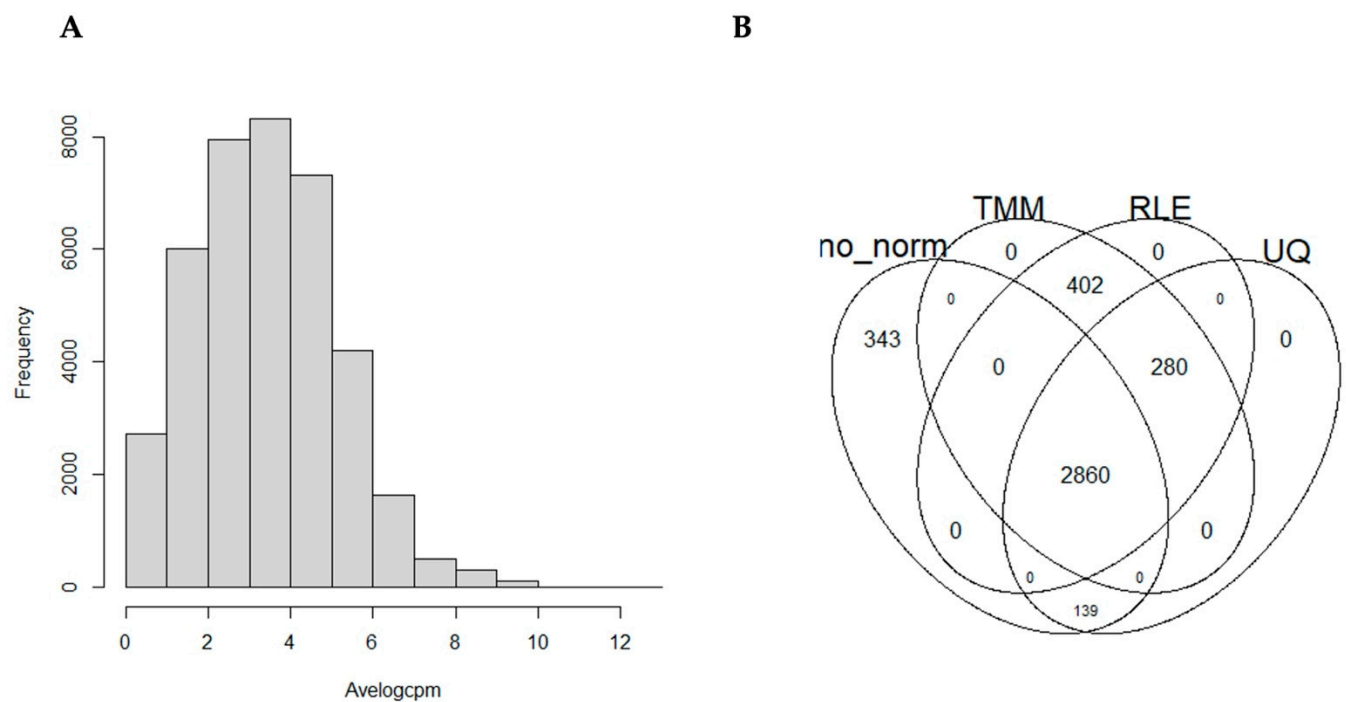

**Figure S1.** Histogram profile of the average log count-per-million (CPM) of the mapped transcript sequences **(A)** and the Venn diagram of transcripts with differential expression using various normalization models **(B)**. Abbreviations: no\_norm = no normalization; TMM = Trimmed Mean of M-values; RLE = Relative Log Expression; UQ = Upper Quartile.

**Table S1.** Full list of transcripts used for differential expression analysis in the Pacific oyster *Crassostrea gigas* transcriptome.

The table is provided as a separate **Table S1.xls** document



**Table S2.** Results of the Blastx homology search for the thirty differential transcript expression in the *C. gigas* transcriptome.

| <i>C. gigas</i><br>Accession No.<br>(Subject) | <i>C. gigas</i><br>Annotation                                        | Homolog<br>Protein ID (Query)                                                 | Species                        | Homolog<br>Accession No. | Identities<br>(Query/<br>Subject) | Homology<br>(%) | BlastX<br>E-value      | Protein<br>Length<br>(Query) |
|-----------------------------------------------|----------------------------------------------------------------------|-------------------------------------------------------------------------------|--------------------------------|--------------------------|-----------------------------------|-----------------|------------------------|------------------------------|
| LOC105335414                                  | Abscisic acid and environmental stress-inducible protein             | Abscisic acid and environmental stress-inducible protein (AESIP)              | <i>Crassostrea gigas</i>       | XP_011437564.2           | 84/84                             | 100             | 0                      | 126                          |
| LOC105341000                                  | Coadhesin                                                            | Coadhesin                                                                     | <i>Crassostrea gigas</i>       | XP_034329440.1           | 831/831                           | 100             | 0                      | 831                          |
| LOC105324992                                  | SCO-spondin                                                          | SCO-spondin                                                                   | <i>Crassostrea gigas</i>       | XP_034330544.1           | 3201/3201                         | 100             | 0                      | 3201                         |
| LOC105338148                                  | Uncharacterized LOC105338148, Isoform X1                             | General transcriptional corepressor trfA-like,1 (trfA-like,1)                 | <i>Mercenaria mercenaria</i>   | XP_045201952.1           | 96/290                            | 33              | 3 x 10 <sup>-29</sup>  | 796                          |
| LOC105347520                                  | A disintegrin and metalloproteinase with thrombospondin motifs adt-1 | A disintegrin and metalloproteinase with thrombospondin motifs adt-1 (ADAM-1) | <i>Crassostrea gigas</i>       | XP_034329445.1           | 595/595                           | 100             | 0                      | 595                          |
| LOC105324594                                  | Uncharacterized LOC105324594                                         | Calcium-dependent protein kinase 7 (CPK7)                                     | <i>Crassostrea gigas</i>       | XP_011427257.2           | 70/136                            | 51              | 2 x 10 <sup>-37</sup>  | 133                          |
| LOC117688777                                  | Spidroin-1-like                                                      | Spidroin-1-like,1                                                             | <i>Crassostrea gigas</i>       | XP_034323067.1           | 46/46                             | 100             | 2 x 10 <sup>-08</sup>  | 308                          |
| LOC105348066                                  | Uncharacterized LOC105348066                                         | Stereocilin                                                                   | <i>Mizuhopecten yessoensis</i> | OWF40357.1               | 483/1126                          | 43              | 0                      | 1412                         |
| LOC105328424                                  | Uncharacterized LOC105328424                                         | IgGFC-binding protein                                                         | <i>Crassostrea gigas</i>       | XP_011422608.2           | 267/678                           | 39              | 6 x 10 <sup>-135</sup> | 708                          |
| LOC105340987                                  | Uncharacterized LOC105340987, isoform X1                             | SCO-spondin-like,1                                                            | <i>Crassostrea virginica</i>   | XP_022339848.1           | 808/866                           | 93              | 0                      | 1957                         |
| LOC105340987                                  | Uncharacterized LOC105340987, isoform X2                             | SCO-spondin-like,2                                                            | <i>Crassostrea virginica</i>   | XP_022339848.1           | 808/866                           | 93              | 0                      | 1957                         |
| LOC109618369                                  | Uncharacterized LOC109618369                                         | General transcriptional corepressor trfA-like,2 (trfA-like,1)                 | <i>Mercenaria mercenaria</i>   | XP_045201952.1           | 97/290                            | 33              | 9 x 10 <sup>-31</sup>  | 796                          |

|              |                                                                       |                                                                                           |                              |                |         |     |                      |      |
|--------------|-----------------------------------------------------------------------|-------------------------------------------------------------------------------------------|------------------------------|----------------|---------|-----|----------------------|------|
| LOC117688778 | Spidroin-1-like                                                       | Spidroin-1-like,2                                                                         | <i>Crassostrea gigas</i>     | XP_034323070.1 | 63/63   | 100 | $7 \times 10^{-13}$  | 238  |
| LOC117688748 | Uncharacterized<br>LOC117688748                                       | Uncharacterized<br>LOC117688748                                                           | <i>Crassostrea gigas</i>     | XP_034322956.1 | 292/292 | 100 | 0                    | 292  |
| LOC117688749 | Uncharacterized<br>LOC117688749                                       | Uncharacterized<br>LOC117688749                                                           | <i>Crassostrea gigas</i>     | XP_034322955.1 | 292/292 | 100 | 0                    | 292  |
| LOC105327237 | Uncharacterized<br>LOC105327237                                       | SCO-spondin-like,3                                                                        | <i>Crassostrea virginica</i> | XP_022339848.1 | 552/806 | 68  | 0                    | 1957 |
| LOC117684686 | ADP-ribosylation<br>factor 1-like                                     | ADP-ribosylation factor 1-<br>like                                                        | <i>Crassostrea gigas</i>     | XP_034313686.1 | 189/189 | 100 | $3 \times 10^{-136}$ | 189  |
| LOC105327534 | Mediator of DNA<br>damage checkpoint<br>protein 1                     | Mediator of DNA damage<br>checkpoint protein 1 (MDC1)                                     | <i>Crassostrea gigas</i>     | XP_011426386.2 | 590/590 | 100 | 0                    | 590  |
| LOC105344419 | Glycine-rich cell wall<br>structural protein 1.8<br>transcript var X2 | Glycine-rich cell wall<br>structural protein 1.8<br>transcript isoform X2 (GRP<br>1.8-X2) | <i>Crassostrea gigas</i>     | XP_034323479.1 | 141/141 | 100 | 0                    | 141  |
| LOC105344419 | Glycine-rich cell wall<br>structural protein 1.8<br>transcript var X1 | Glycine-rich cell wall<br>structural protein 1.8<br>transcript isoform X1 (GRP<br>1.8-X1) | <i>Crassostrea gigas</i>     | XP_011450501.3 | 155/155 | 100 | 0                    | 155  |
| LOC105329902 | Uncharacterized<br>LOC105329902                                       | Tyrp-1                                                                                    | <i>Hyriopsis cumingii</i>    | APC92582.1     | 282/731 | 39  | $2 \times 10^{-157}$ | 778  |
| LOC105334609 | Collagen alpha-2(I)<br>chain                                          | Collagen alpha-2(I) chain                                                                 | <i>Crassostrea gigas</i>     | XP_011436430.2 | 173/173 | 100 | $6 \times 10^{-37}$  | 173  |
| LOC105324991 | IgGFC-binding protein                                                 | IgGFC-binding protein                                                                     | <i>Crassostrea gigas</i>     | XP_011422608.2 | 687/687 | 100 | 0                    | 708  |
| LOC105345892 | Leucine-rich repeat-<br>containing protein 4C                         | Leucine-rich repeat-<br>containing protein 4C<br>(LRRC4C)                                 | <i>Crassostrea gigas</i>     | XP_011452538.2 | 391/391 | 100 | 0                    | 391  |
| LOC105322623 | Uncharacterized<br>LOC105322623                                       | Uncharacterized<br>LOC105322623                                                           | <i>Crassostrea gigas</i>     | XP_011419747.2 | 400/400 | 100 | 0                    | 400  |
| LOC105330463 | Spidroin-1-like                                                       | Spidroin-1-like,3                                                                         | <i>Crassostrea gigas</i>     | XP_034323071.1 | 30/30   | 100 | $3 \times 10^{-08}$  | 236  |
| LOC105345888 | Uncharacterized<br>LOC105345888                                       | CD283                                                                                     | <i>Mytilus edulis</i>        | CAG2230452.1   | 131/372 | 35  | $3 \times 10^{-59}$  | 392  |
| LOC105319426 | Acanthoscurrin-2                                                      | Acanthoscurrin-2                                                                          | <i>Crassostrea gigas</i>     | XP_011415271.2 | 161/161 | 100 | 0                    | 161  |

|              |                                            |                                                                     |                                |                |         |     |                     |     |
|--------------|--------------------------------------------|---------------------------------------------------------------------|--------------------------------|----------------|---------|-----|---------------------|-----|
| LOC105345889 | Leucine-rich repeat<br>LGI family member 2 | Leucine-rich repeat LGI<br>family member 2 (LGI2)                   | <i>Crassostrea gigas</i>       | XP_011452536.2 | 195/195 | 100 | 0                   | 195 |
| LOC117688175 | Uncharacterized<br>LOC117688175            | Serine/arginine repetitive<br>matrix protein 1-like<br>(SRRM1-like) | <i>Mizuhopecten yessoensis</i> | XP_021357253.1 | 108/218 | 50  | $9 \times 10^{-62}$ | 760 |

**Table S3.** Results of the Blastx homology search for the differential transcript expression involved in the Gene Ontology enriched processes of the *C. gigas* transcriptome.

| <i>C. gigas</i> Accession<br>No. (Subject) | Protein ID (Query)                              | Species                        | Homolog Accession No. | Identities<br>(Query/Subject) | Homology<br>(%) | BlastX E-<br>value   | Protein<br>Length<br>(Query) |
|--------------------------------------------|-------------------------------------------------|--------------------------------|-----------------------|-------------------------------|-----------------|----------------------|------------------------------|
| <b>Chitin binding (GO:0008061)</b>         |                                                 |                                |                       |                               |                 |                      |                              |
| LOC105326593                               | cgPif97                                         | <i>Crassostrea gigas</i>       | AFT63504.1            | 881/1024                      | 86              | 0                    | 438                          |
| LOC105317660                               | Peritrophin-44                                  | <i>Crassostrea gigas</i>       | XP_011412673.1        | 288/288                       | 100             | $3 \times 10^{-98}$  | 138                          |
| LOC105346858                               | Lactadherin, 1                                  | <i>Mizuhopecten yessoensis</i> | OWF43623.1            | 40/141                        | 28              | $1 \times 10^{-06}$  | 565                          |
| LOC105346858                               | Lactadherin, 2                                  | <i>Mizuhopecten yessoensis</i> | OWF43623.1            | 40/141                        | 28              | $1 \times 10^{-06}$  | 565                          |
| LOC105331104                               | Collagen alpha 1(XII) chain                     | <i>Mytilus coruscus</i>        | CAC5362153.1          | 373/693                       | 54              | 0                    | 797                          |
| LOC105336951                               | Peritrophin-1-like                              | <i>Mizuhopecten yessoensis</i> | XP_021368929.1        | 101/233                       | 43              | $4 \times 10^{-53}$  | 239                          |
| LOC105329937                               | Peritrophin-1-like                              | <i>Gigantopelta aegis</i>      | XP_041349873.1        | 67/144                        | 47              | $9 \times 10^{-35}$  | 229                          |
| LOC105332576                               | Cleavage and polyadenylation factor I subunit 1 | <i>Crassostrea gigas</i>       | NP_001292250.1        | 472/472                       | 100             | 0                    | 472                          |
| LOC105332577                               | Putative chitinase 1 precursor                  | <i>Crassostrea gigas</i>       | NP_001292252.1        | 475/475                       | 100             | 0                    | 475                          |
| LOC105332575                               | Putative chitinase                              | <i>Crassostrea gigas</i>       | NP_001295799.1        | 471/471                       | 100             | 0                    | 471                          |
| <b>Calcium ion binding (GO:0005509)</b>    |                                                 |                                |                       |                               |                 |                      |                              |
| LOC105323227                               | DNA ligase 1 Isoform X1                         | <i>Crassostrea gigas</i>       | XP_011420555.2        | 843/843                       | 100             | 0                    | 843                          |
|                                            | DNA ligase 1 Isoform X2                         | <i>Crassostrea gigas</i>       | XP_011420556.2        | 843/843                       | 100             | 0                    | 843                          |
|                                            | DNA ligase 1 Isoform X3                         | <i>Crassostrea gigas</i>       | XP_011420558.2        | 811/811                       | 100             | 0                    | 811                          |
|                                            | DNA ligase 1 Isoform X4                         | <i>Crassostrea gigas</i>       | XP_011420559          | 811/811                       | 100             | 0                    | 811                          |
|                                            | DNA ligase 1 Isoform X5                         | <i>Crassostrea gigas</i>       | XP_011420561          | 795/795                       | 100             | 0                    | 795                          |
|                                            | DNA ligase 1 Isoform X6                         | <i>Crassostrea gigas</i>       | XP_034305628          | 766/766                       | 100             | 0                    | 766                          |
| LOC105345764                               | EF-hand domain-containing protein 1             | <i>Crassostrea gigas</i>       | XP_011452353.1        | 641/641                       | 100             | 0                    | 641                          |
| LOC105331896                               | Calmodulin-4 transcript var X1                  | <i>Crassostrea gigas</i>       | XP_011432565.2        | 178/178                       | 100             | $4 \times 10^{-122}$ | 178                          |
|                                            | Calmodulin-4 transcript var X2                  | <i>Crassostrea gigas</i>       | XP_011432571.2        | 176/176                       | 100             | $1 \times 10^{-122}$ | 176                          |
|                                            | Calmodulin-4 transcript var X3                  | <i>Crassostrea gigas</i>       | XP_011432579.2        | 175/175                       | 100             | $8 \times 10^{-122}$ | 175                          |

|                                          |                                                                  |                              |                |         |     |                      |      |
|------------------------------------------|------------------------------------------------------------------|------------------------------|----------------|---------|-----|----------------------|------|
| LOC105337218                             | Calcium-binding protein E63-1-like                               | <i>Haliotis rubra</i>        | XP_046557623.1 | 26/70   | 37  | 0.002                | 144  |
| LOC105328000                             | Calmodulin-A isoform X1                                          | <i>Crassostrea gigas</i>     | XP_011427010.1 | 159/159 | 100 | $4 \times 10^{-95}$  | 210  |
|                                          | Calmodulin-A isoform X2                                          | <i>Crassostrea gigas</i>     | XP_011427011.1 | 153/153 | 100 | $4 \times 10^{-90}$  | 204  |
| LOC105320395                             | Leucine-rich repeat-containing protein 74B isoform X1            | <i>Crassostrea gigas</i>     | XP_011416624.1 | 601/601 | 100 | 0                    | 601  |
|                                          | Leucine-rich repeat-containing protein 74B isoform X2            | <i>Crassostrea gigas</i>     | XP_011416625.1 | 601/601 | 100 | 0                    | 601  |
|                                          | Leucine-rich repeat-containing protein 74B isoform X3            | <i>Crassostrea gigas</i>     | XP_034323188.1 | 601/601 | 100 | 0                    | 601  |
|                                          | Leucine-rich repeat-containing protein 74B isoform X4            | <i>Crassostrea gigas</i>     | XP_011416626.1 | 574/574 | 100 | 0                    | 574  |
|                                          | Leucine-rich repeat-containing protein 74B isoform X5            | <i>Crassostrea gigas</i>     | XP_011416627.1 | 563/563 | 100 | 0                    | 563  |
| LOC105332695                             | Sarcoplasmic calcium-binding protein                             | <i>Crassostrea gigas</i>     | XP_011433684.1 | 179/179 | 100 | 0                    | 179  |
| LOC105338472                             | Myosin                                                           | <i>Crassostrea gigas</i>     | XP_011441922.1 | 162/162 | 100 | 0                    | 162  |
| LOC105330202                             | EGF-like repeat and discoidin I-like domain-containing protein 3 | <i>Mercenaria mercenaria</i> | XP_045201990.1 | 150/321 | 65  | $9 \times 10^{-89}$  | 322  |
| LOC105341555                             | Mammalian ependymin-related protein 1                            | <i>Crassostrea gigas</i>     | XP_011446436.2 | 205/205 | 100 | 0                    | 205  |
| LOC105327335                             | EF-hand domain-containing family member B                        | <i>Crassostrea gigas</i>     | XP_011426045.1 | 602/602 | 100 | 0                    | 602  |
| LOC105327434                             | Neurocalcin homolog                                              | <i>Crassostrea gigas</i>     | XP_011426213.2 | 185/185 | 100 | 0                    | 185  |
| LOC105334536                             | Sarcoplasmic calcium-binding protein isoform X2                  | <i>Crassostrea gigas</i>     | XP_011436355.1 | 178/178 | 100 | 0                    | 178  |
| LOC105335092                             | Neurocalcin homolog                                              | <i>Crassostrea gigas</i>     | XP_011437085.1 | 185/185 | 100 | 0                    | 185  |
| LOC105336644                             | Regucalcin isoform X1                                            | <i>Crassostrea gigas</i>     | XP_011439353.1 | 308/308 | 100 | 0                    | 308  |
|                                          | Regucalcin isoform X2                                            | <i>Crassostrea gigas</i>     | XP_019926340.2 | 308/308 | 100 | 0                    | 308  |
| LOC105336648                             | Regucalcin transcript variant X1                                 | <i>Crassostrea gigas</i>     | XP_011439356.2 | 300/300 | 100 | 0                    | 300  |
|                                          | Regucalcin variant X3                                            | <i>Crassostrea gigas</i>     | XP_011439357.2 | 300/300 | 100 | 0                    | 300  |
| LOC105335791                             | Annexin A4                                                       | <i>Crassostrea gigas</i>     | XP_011438182.2 | 311/311 | 100 | 0                    | 311  |
| <b>Extracellular region (GO:0005576)</b> |                                                                  |                              |                |         |     |                      |      |
| LOC105321645                             | Poly(3-hydroxyalkanoate) depolymerase C                          | <i>Orchesella cincta</i>     | ODN05040.1     | 145/328 | 44  | $4 \times 10^{-83}$  | 350  |
|                                          | Poly(3-hydroxyalkanoate) depolymerase C                          | <i>Orchesella cincta</i>     | ODN05040.1     | 106/233 | 45  | $6 \times 10^{-65}$  | 350  |
| LOC105326593                             | Pif97                                                            | <i>Crassostrea gigas</i>     | AFT63504.1     | 438/438 | 100 | 0                    | 438  |
| LOC105342849                             | Trithorax group protein osa-like (for transcript variant X1)     | <i>Crassostrea virginica</i> | XP_022308844.1 | 368/697 | 53  | $4 \times 10^{-158}$ | 1637 |
|                                          | Trithorax group protein osa-like (for transcript variant X2)     | <i>Crassostrea virginica</i> | XP_022308844.1 | 368/697 | 53  | $3 \times 10^{-158}$ | 1637 |
| LOC105340688                             | NPC intracellular cholesterol transporter 2                      | <i>Crassostrea gigas</i>     | XP_011445166.2 | 144/144 | 100 | 0                    | 144  |

|              |                                                          |                                |                |         |     |                     |     |
|--------------|----------------------------------------------------------|--------------------------------|----------------|---------|-----|---------------------|-----|
| LOC105341555 | Mammalian ependymin-related protein 1                    | <i>Crassostrea gigas</i>       | XP_011446436.2 | 205/205 | 100 | 0                   | 205 |
| LOC105317660 | Peritrophin-44                                           | <i>Crassostrea gigas</i>       | XP_011412673.1 | 288/288 | 100 | $3 \times 10^{-98}$ | 138 |
| LOC105346858 | Lactadherin, 1                                           | <i>Mizuhopecten yessoensis</i> | OWF43623.1     | 40/141  | 28  | $1 \times 10^{-06}$ | 565 |
|              | Lactadherin, 2                                           | <i>Mizuhopecten yessoensis</i> | OWF43623.1     | 40/141  | 28  | $1 \times 10^{-06}$ | 565 |
| LOC105318009 | Golgi-associated plant pathogenesis-related protein 1    | <i>Crassostrea gigas</i>       | XP_011413171.2 | 236/236 | 100 | 0                   | 236 |
| LOC105331104 | Collagen alpha 1(XII) chain                              | <i>Mytilus coruscus</i>        | CAC5362153.1   | 373/693 | 54  | 0                   | 797 |
| LOC105345005 | Dermatopontin isoform X1                                 | <i>Crassostrea gigas</i>       | XP_011451270.1 | 192/192 | 100 | 0                   | 192 |
|              | Dermatopontin isoform X2                                 | <i>Crassostrea gigas</i>       | XP_034301840.1 | 182/182 | 100 | 0                   | 182 |
| LOC105338558 | Metalloproteinase inhibitor 3                            | <i>Crassostrea gigas</i>       | XP_011442039.2 | 251/251 | 100 | 0                   | 251 |
| LOC105336951 | Peritrophin-1-like                                       | <i>Mizuhopecten yessoensis</i> | XP_021368929.1 | 101/233 | 43  | $4 \times 10^{-53}$ | 239 |
| LOC105329937 | Peritrophin-1-like                                       | <i>Gigantopelta aegis</i>      | XP_041349873.1 | 67/144  | 47  | $9 \times 10^{-35}$ | 229 |
| LOC105345185 | Inactive pancreatic lipase-related protein 1             | <i>Crassostrea gigas</i>       | XP_011451564.2 | 357/357 | 100 | 0                   | 357 |
| LOC105331423 | Pancreatic lipase-related protein 2                      | <i>Crassostrea gigas</i>       | XP_011431904.2 | 518/518 | 100 | 0                   | 158 |
| LOC105343616 | Adenosine deaminase AGSA isoform X1, X2                  | <i>Crassostrea gigas</i>       | XP_011449339.2 | 612/612 | 100 | 0                   | 645 |
| LOC105327922 | von Willebrand factor C domain-containing protein 2-like | <i>Crassostrea gigas</i>       | XP_011426902.2 | 137/137 | 100 | 0                   | 137 |
